# Supplementary material
Source: publisher figshare collection journal article supplement (https://sage.figshare.com/ndownloader/files/17282684)
Supplement: Supplementary file 1 [file 17282684]

1. **I have included a ‘problem statement’ on the opening page** (editor 2) that details the shortcomings of the current debates on diaspora and where its unmet promise. I have drawn from the conclusion to support this claim. I write (p.1):
 

“The problem with returning diaspora to the homeland is that it elides the concept’s multiple lines of connection.” (sentence 2)

“Diaspora’s current status departs from the conceptual ferment it once caused in its challenge to the social sciences’ hermetically sealed and spatially bounded conceptions of politics and culture.” (sentence 4)

“With diaspora populations now seemingly functioning as the state’s proxy, the concept’s robust theoretical interventions risk being extinguished.” (final sentence of opening paragraph)
2. **I have introduced my argument regarding the city** at the start of the sub-section formerly titled ‘Breaking Boundaries in the City’ Editor 2). I have changed the subheading to ‘*Making home by traversing boundaries*’ in order to integrate the two sub-sections of this section (R1)
3. I have **clarified the statement on page 25** (Editor 2) to read:
 

“Diaspora urbanism’s emphasis on the multiple histories and experiences of dispersal and settlement in the city also help to expose how diasporic politics towards the homeland transcend the sociospatial borders of the city by forging connections to multiple sites.”
4. I have more **simply stated a number of sentences** across the entire manuscript. I have **subjected the entire manuscript to a careful editing towards clarity**. These stylistic edits including the sentences highlighted by editor 2.  
Please note that the edits (and deletions) have shortened the length of the manuscript to 7695 words, excluding references (from 7973)
5. I have **deleted the context of the Chicago School** in the ‘Diaspora Urbanism’ section in order to devote more space to my argument (R1).
6. I have **clarified my argument** on pages 21-23 by integrating the various conceptual arguments of other scholars and clarifying my reference to Bhabha (R1). I have emphasized the contribution of ‘diaspora urbanism’ to these debates throughout the section.
7. In order to further address Editor 1’s comment on foregrounding the problem statement, I have changed the title of the manuscript to better reflect the focus and argument of my essay. The new title is “The Spaces of Diaspora's Revitalization: Transregions, Infrastructure, and Urbanism.”
8. I have included a handful of additional references.

9. I have edited the citations and references to ensure that it corresponds with the style of *Progress in Human Geography*.
